# Supplementary material for: Precipitation extremes in Ukraine from 1979 to 2019: climatology, large-scale flow conditions, and moisture sources
Source: Copernicus journal article supplement (doi:10.5194/nhess-24-2441-2024), 2024-07-18
Supplement: Supplementary file 1 [file nhess-24-2441-2024-supplement.pdf]

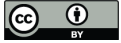

*Supplement of*

## **Precipitation extremes in Ukraine from 1979 to 2019: climatology, large-scale flow conditions, and moisture sources**

**Ellina Agayar et al.**

*Correspondence to:* Ellina Agayar ([ellina.agayar@env.ethz.ch](mailto:ellina.agayar@env.ethz.ch))

The copyright of individual parts of the supplement might differ from the article licence.

## Supplementary Material: S1 List of events

**Table S.1 Extreme precipitation events ( $\geq 100$  mm day<sup>-1</sup>) recorded by observations of meteorological stations in Ukraine (1979-2019)**

|    | <b>Station</b>    | <b>date</b> | <b>lat</b> | <b>long</b> | <b>Precipitation<br/>mm day<sup>-1</sup></b> |
|----|-------------------|-------------|------------|-------------|----------------------------------------------|
| 1  | Jashkiv           | 19810916    | 49.2445003 | 30.0901794  | 110.4                                        |
| 2  | Krasnograd        | 19810826    | 49.3716433 | 35.4473877  | 107.3                                        |
| 3  | Mogilev-Podilckii | 19810701    | 48.4510656 | 27.7789307  | 108.8                                        |
| 4  | Belopole(Vin)     | 19820701    | 49.8446248 | 28.8693237  | 129.1                                        |
| 5  | Strelkove         | 19830727    | 45.9024330 | 34.8764420  | 101.2                                        |
| 6  | Loshkarivka       | 19830705    | 48.0652321 | 34.6010971  | 154.2                                        |
| 7  | Mariupol          | 19830726    | 47.1299508 | 37.5292969  | 102.5                                        |
| 8  | Nova Ushica       | 19830703    | 48.8294696 | 27.2598267  | 126.8                                        |
| 9  | Olevsk            | 19840705    | 51.2206474 | 27.6470947  | 110.8                                        |
| 10 | Nijni Serogozi    | 19850626    | 46.8423465 | 34.3721008  | 114.9                                        |
| 11 | Reni              | 19850803    | 45.4562776 | 28.2815552  | 100.5                                        |
| 12 | Doneck            | 19860905    | 48.0027873 | 37.8067017  | 125.4                                        |
| 13 | Klepiline         | 19890616    | 45.5941014 | 34.2169189  | 114.0                                        |
| 14 | Kupyansk          | 19890804    | 49.7084965 | 37.6309204  | 103.5                                        |
| 15 | Lubeshiv          | 19910703    | 51.7661401 | 25.5322266  | 119.3                                        |
| 16 | Volodimir volin   | 19910617    | 50.8423702 | 24.3168640  | 128.2                                        |
| 17 | Novodnistrovsk    | 19910803    | 48,5806956 | 27,4411011  | 120.5                                        |
| 18 | Karadag           | 19910902    | 44.9332103 | 35.2262878  | 278.0                                        |
| 19 | Feodosiya         | 19910902    | 45.0279211 | 35.3814697  | 132.3                                        |
| 20 | Chernovci         | 19910727    | 48.32535   | 28.6883800  | 111.2                                        |
| 21 | Plai              | 19921029    | 48.6648907 | 23.1962585  | 102.1                                        |
| 22 | Ai-Petri          | 19920218    | 44.4479970 | 34.0555573  | 127.3                                        |
| 23 | Rahiv             | 19931221    | 48.0468738 | 24.2028809  | 101.4                                        |
| 24 | Loshkarivka       | 19950804    | 48.0652321 | 34.6010971  | 107.5                                        |
| 25 | Serbka            | 19960627    | 47.0095233 | 30.7610321  | 148.4                                        |
| 26 | Pomoshnaya        | 19970829    | 48.2420528 | 31.4071655  | 110.2                                        |
| 27 | Kolomiya          | 19970803    | 48.5238812 | 25.0309753  | 124.6                                        |
| 28 | Mizhhiria         | 19981104    | 48.5275192 | 23.5079956  | 103.1                                        |
| 29 | Poshtove          | 19980610    | 44.8266563 | 33.9724731  | 133.0                                        |
| 30 | Kherson           | 19980518    | 46.6494362 | 32.6513672  | 100.5                                        |
| 31 | Simferopol        | 19990801    | 44.9414734 | 34.1125488  | 104.5                                        |
| 32 | Ai-Petri          | 19991227    | 44.4479970 | 34.0555573  | 112.5                                        |
| 33 | Ai-Petri          | 19991228    | 44.4479970 | 34.0555573  | 115.3                                        |
| 34 | Sarni             | 19990727    | 51.3353308 | 26.6150665  | 124.0                                        |
| 35 | Yalta             | 19991228    | 44.4906277 | 34.1400146  | 100.0                                        |
| 36 | Opasne            | 19990729    | 45.4449577 | 36.4249992  | 108.1                                        |
| 37 | Opasne            | 19990826    | 45.4449577 | 36.4249992  | 103.8                                        |
| 38 | Opasne            | 20000802    | 45.4449577 | 36.4249992  | 103.6                                        |
| 39 | Kam-Podolsky      | 20000714    | 48.6764537 | 26.5649414  | 100.0                                        |
| 40 | Svitlovodsk       | 20010726    | 49.0459698 | 33.2137299  | 128.8                                        |
| 41 | Feodosiya         | 20010509    | 45.0279211 | 35.3814697  | 101.4                                        |
| 42 | Yaremcha          | 20010824    | 48.4419563 | 24.5379639  | 106.3                                        |

|    |                       |          |            |            |       |
|----|-----------------------|----------|------------|------------|-------|
| 43 | Pozhezhevsca          | 20010305 | 48.1436398 | 24.5232010 | 116.9 |
| 44 | Sarata                | 20010906 | 46.0179461 | 29.6740723 | 118.8 |
| 45 | Odesa                 | 20020815 | 46.4775908 | 30.6985474 | 106.3 |
| 46 | Pochtove              | 20020723 | 44.8266563 | 33.9724731 | 137.8 |
| 47 | Nejin                 | 20020530 | 51.0301674 | 31.8754578 | 103.2 |
| 48 | Mironovka             | 20030804 | 48.4610840 | 38.2557678 | 105.6 |
| 49 | Alushta               | 20040714 | 44.6745126 | 34.4146729 | 107.4 |
| 50 | Nijni Serogoz         | 20040807 | 46.847043  | 34.3789673 | 106.7 |
| 51 | Simferopol            | 20040811 | 44.9453614 | 34.0960693 | 119.2 |
| 52 | Volodimir volin       | 20070602 | 50.8423702 | 24.3168640 | 110.9 |
| 53 | Bilgor Dnestr         | 20080921 | 46.1798304 | 30.3497314 | 100.2 |
| 54 | Yaremcha              | 20080625 | 48.4419563 | 24.5379639 | 111.4 |
| 55 | Mariupol              | 20080727 | 47.1299508 | 37.5292969 | 111.0 |
| 56 | Luibashivka           | 20080723 | 47.8279082 | 30.2618408 | 131.4 |
| 57 | Rakhiv                | 20080301 | 48.0468738 | 24.2028809 | 100.4 |
| 58 | Slabojanske           | 20100921 | 49.5929095 | 36.5185547 | 117.5 |
| 59 | Strelkove             | 20100709 | 45.9024330 | 34.8764420 | 100.7 |
| 60 | Yaremcha              | 20100708 | 48.4419563 | 24.5379639 | 103.2 |
| 61 | Dolincka              | 20100711 | 48.1055972 | 32.7749634 | 121.9 |
| 62 | Izum                  | 20100711 | 49.1888842 | 37.2656250 | 128.2 |
| 63 | Baryshivka            | 20110701 | 50.3656128 | 31.3069153 | 130.5 |
| 64 | Novomirgorod          | 20110627 | 48.7960089 | 31.6625977 | 100.0 |
| 65 | Yagotin               | 20110701 | 50.2761763 | 31.7642212 | 101.7 |
| 66 | Luck                  | 20130730 | 50.7503593 | 25.3125000 | 122.0 |
| 67 | Ai-Petri              | 20140924 | 44.4479970 | 34.0555573 | 107.8 |
| 68 | Klepinine             | 20140603 | 45.5941014 | 34.2169189 | 102.8 |
| 69 | Lozova                | 20140531 | 48.8936154 | 36.2796021 | 104.4 |
| 70 | Pryshyb               | 20140924 | 47.2764041 | 35.3320100 | 114.7 |
| 71 | Synelnykove           | 20140924 | 48.3270391 | 35.5215454 | 100.1 |
| 72 | Yaremcha              | 20140515 | 48.4419563 | 24.5379639 | 104.7 |
| 73 | Gaivoron              | 20150709 | 48.3325173 | 29.8196411 | 108.2 |
| 74 | Bilhorod Dnistrovskiy | 20160920 | 46.1798304 | 30.3497314 | 135.2 |
| 75 | Bolhrad               | 20161012 | 45.6946698 | 28.6029053 | 102.9 |
| 76 | Odessa                | 20160920 | 46.4775908 | 30.6985474 | 112.9 |
| 77 | Feodosiya             | 20180906 | 45.0279211 | 35.3814697 | 107.0 |
| 78 | Berdyansk             | 20180916 | 46.7455071 | 36.8151855 | 111.9 |
| 79 | Drogobich             | 20190813 | 49.3483882 | 23.5368347 | 108.0 |
| 80 | Khorly                | 20190804 | 46.0793038 | 33.2966423 | 106.4 |
| 81 | Bilhorod Dnistrovskiy | 20190804 | 46.1798304 | 30.3497314 | 125.2 |
| 82 | Gaivoron              | 20190605 | 48.3452973 | 29.8223877 | 104.0 |

## Supplementary Material: S2 Moisture sources regions

**Table S.2 Moisture sources regions and relative contribution of terrestrial and oceanic sources (%) for individual EPEs in Ukraine**

| Moisture uptake regions |          |         |       |             |      |        |                         |                |                |              |        |                            |                              |              |              |                 |               |
|-------------------------|----------|---------|-------|-------------|------|--------|-------------------------|----------------|----------------|--------------|--------|----------------------------|------------------------------|--------------|--------------|-----------------|---------------|
| Station                 | Date     | Ukraine | Italy | the Balkans | Asia | Africa | the East European Plane | Western Europe | Eastern Europe | the Azov Sea | Arctic | North Atlantic midlatitude | North Atlantic (sub)tropical | Western Med. | Eastern Med. | the Caspian Sea | the Black Sea |
| Ai-Petri                | 19991227 | 0.8     | 4.9   | 8.4         | 5.0  | 1.8    | 0.1                     | 7.9            | 3.7            | 0.1          | 0.2    | 15.6                       | 0.3                          | 23.5         | 10.9         | 0.0             | 13.5          |
| Ai-Petri                | 19991228 | 0.2     | 5.5   | 6.5         | 6.6  | 1.8    | 0.02                    | 7.9            | 0.2            | 0.0          | 0.0    | 28.0                       | 0.7                          | 18.6         | 14.2         | 0.0             | 6.5           |
| Yalta                   | 19991228 | 0.2     | 5.5   | 6.5         | 6.6  | 1.8    | 0.02                    | 7.9            | 0.2            | 0.0          | 0.0    | 28.0                       | 0.7                          | 18.6         | 14.2         | 0.0             | 6.5           |
| Rakhiv                  | 19931221 | 2.1     | 4.4   | 2.6         | 0.0  | 0.0    | 0.0                     | 9.4            | 13.1           | 0.0          | 0.1    | 39.2                       | 18.1                         | 9.3          | 0.0          | 0.0             | 0.0           |
| Yaremcha                | 20140515 | 19.1    | 4.0   | 7.6         | 0.4  | 0.6    | 0.41                    | 8.2            | 36.6           | 0.0          | 0.1    | 11.1                       | 0.5                          | 6.3          | 0.9          | 0.0             | 2.8           |
| Lozova                  | 20140531 | 15.0    | 0.1   | 1.5         | 27.1 | 0.2    | 0.91                    | 0.2            | 18.4           | 5.5          | 0.7    | 0.7                        | 0.0                          | 0.4          | 1.1          | 14.7            | 13.1          |
| Barishivka              | 20110701 | 18.5    | 0     | 0.4         | 32.4 | 0.0    | 29.3                    | 0.4            | 9.07           | 0.3          | 1.0    | 1.7                        | 0.0                          | 0.0          | 0.3          | 2.3             | 4.12          |
| Khorly                  | 20190804 | 9.6     | 2.4   | 9.4         | 0.0  | 4.2    | 0.0                     | 9.8            | 47.9           | 0.0          | 0.1    | 9.0                        | 0.3                          | 5.8          | 0.0          | 0.0             | 1.1           |
| Ai-Petri                | 20140924 | 16.0    | 0.3   | 0.7         | 1.1  | 0.1    | 22.07                   | 3.4            | 9.1            | 0.1          | 8.4    | 15.5                       | 0.0                          | 0.5          | 0.1          | 0.2             | 21.1          |
| Pryshyb                 | 20140924 | 15.0    | 0.1   | 1.5         | 27.1 | 0.2    | 18.41                   | 0.2            | 0.9            | 5.5          | 0.7    | 0.7                        | 0.0                          | 0.4          | 1.1          | 14.7            | 13.0          |
| Synelnykove             | 20140924 | 15.0    | 0.1   | 1.5         | 27.1 | 0.2    | 18.41                   | 0.2            | 0.9            | 5.5          | 0.7    | 0.7                        | 0.0                          | 0.4          | 1.1          | 14.7            | 13.0          |
| Bolhrad                 | 20161012 | 7.4     | 3.5   | 12.4        | 5.0  | 1.2    | 2.3                     | 4.1            | 10.8           | 2.6          | 0.3    | 2.5                        | 0.0                          | 16.2         | 8.5          | 0.1             | 21.5          |

## Supplementary Material: S3 Seasonal average anomalies

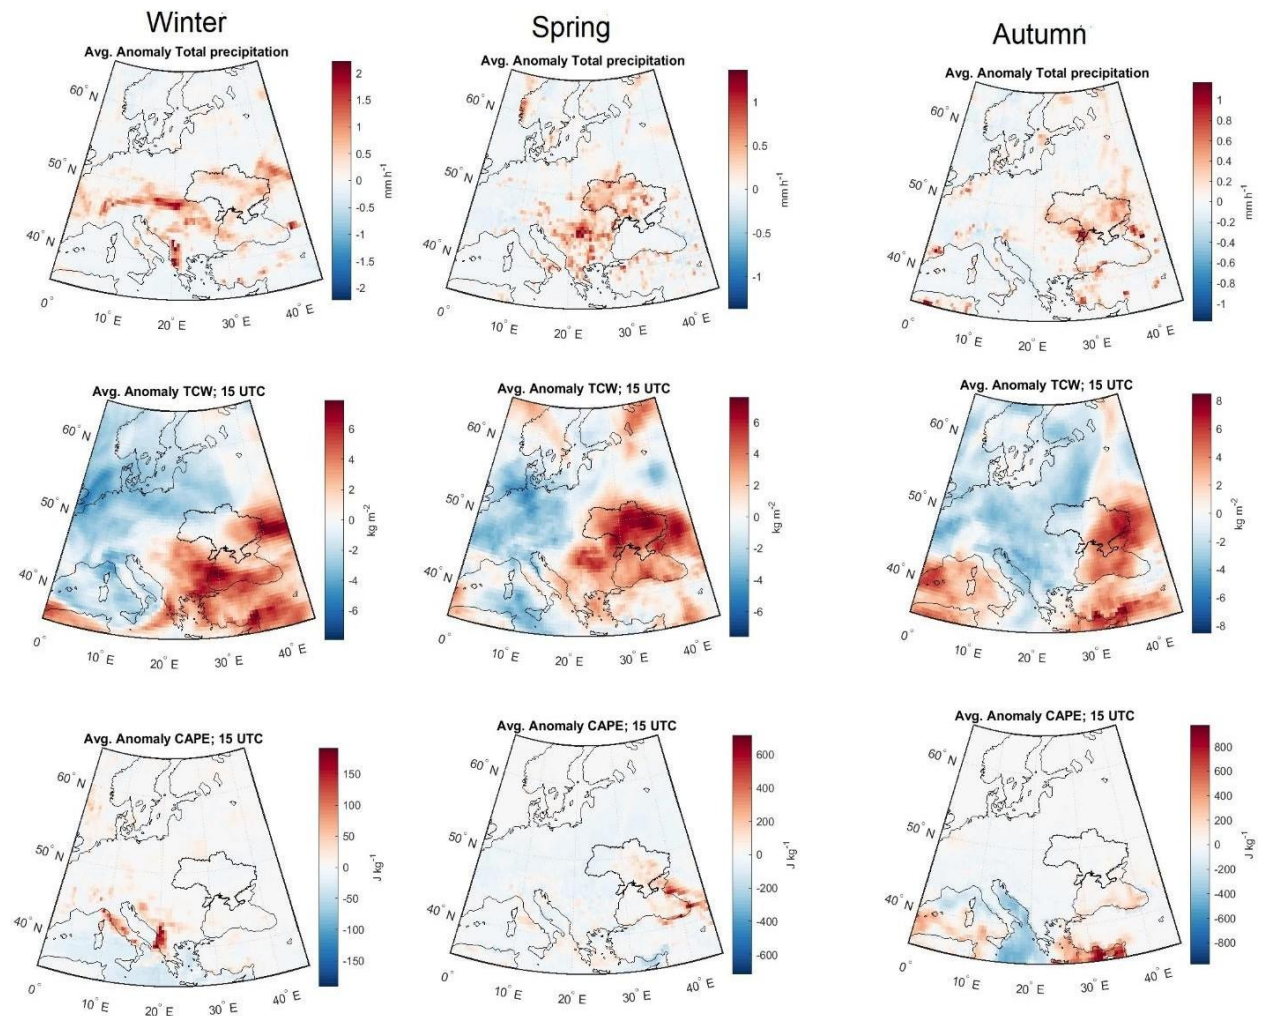

**Fig. S1** Seasonal anomalies of total precipitation, TCW and CAPE on EPE days

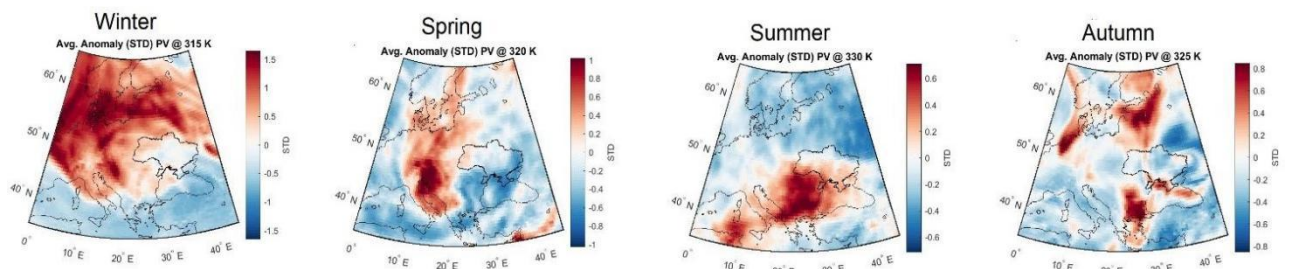

**Fig. S2** Variability of PV anomalies during EPEs for the different seasons (in standard deviation units).

## Supplementary Material: S4 Mean seasonal characteristics of EPEs in Ukraine

**Table S3 Mean seasonal characteristics of EPEs in Ukraine: Anomalies (units), moisture sources (MS, %) and affected regions. Table abbreviations: W-west, E-east, S-south, N-north.**

|                  | Winter                                                                                                                                                      | Spring                                                                                                                                   | Summer                                                                                                                                                  | Autumn                                                                                                                                                              |
|------------------|-------------------------------------------------------------------------------------------------------------------------------------------------------------|------------------------------------------------------------------------------------------------------------------------------------------|---------------------------------------------------------------------------------------------------------------------------------------------------------|---------------------------------------------------------------------------------------------------------------------------------------------------------------------|
| Z <sub>500</sub> | Upper-level trough over E Europe & Ukraine: -241 m                                                                                                          | Upper-level low over E & S Europe, Ukraine: -48 m                                                                                        | Upper-level low over the Balkans, the Black Sea & Ukraine: -43 m                                                                                        | Upper-level low over the Black Sea & Ukraine: -79 m                                                                                                                 |
| MSLP             | Low over the Balkans: -24 hPa<br>SE Ukraine: -20 hPa                                                                                                        | Low over W & SW Ukraine: -6 hPa                                                                                                          | Low over Ukraine: -4 hPa                                                                                                                                | Low over the Black Sea & E Ukraine: -12 hPa                                                                                                                         |
| PV (+)           | Isentropic levels                                                                                                                                           |                                                                                                                                          |                                                                                                                                                         |                                                                                                                                                                     |
|                  | 315 K                                                                                                                                                       | 325 K                                                                                                                                    | 335 K                                                                                                                                                   | 330 K                                                                                                                                                               |
|                  | PV(+) north of 40°N: 0.1-2.5 PVU<br>Cutoff over NE Black Sea region: 0.2-0.5 PVU                                                                            | PV(+) over E Europe & W Ukraine: 1-2 PVU                                                                                                 | Cutoff over the Balkans, Black Sea & SW Ukraine: 0.2-1 PVU                                                                                              | PV(+) over the Baltic region, N, Central & SW of Ukraine: 0.2-1 PVU;<br>Cutoff over E Ukraine: 0.2-1 PVU                                                            |
| U <sub>300</sub> | SW jet stream over Mediterranean: +35 m·s <sup>-1</sup> ,<br>the Balkans: +30 m·s <sup>-1</sup><br>Ukraine, the Black & Azov Seas: +15-25 m·s <sup>-1</sup> | N jet stream over E Europe, the Balkans & W Ukraine: +10 m·s <sup>-1</sup>                                                               | Negative anomaly over W Ukraine: -10 m·s <sup>-1</sup><br>Positive anomaly over the Balkans & the Black Sea: +5 m·s <sup>-1</sup>                       | SW jet stream over the Black Sea & E Ukraine: +10 m·s <sup>-1</sup>                                                                                                 |
| MS               | 1. North Atlantic (24 %),<br>2. Western Med (18 %)<br>3. Eastern Med (12 %)<br>4. Black Sea (7 %)                                                           | 1. Eastern Europe (22 %)<br>2. North Atlantic (14 %)<br>3. Ukraine (14 %)<br>4. East European Plain & Asia (17 %)<br>5. Caspian Sea (3%) | 1. Eastern Europe (25 %)<br>2. Ukraine (19 %)<br>3. East European Plain (11 %)<br>4. Black Sea (8 %)<br>5. North Atlantic (7 %)<br>6. Caspian Sea (2 %) | 1. Eastern Europe (18 %)<br>2. Ukraine (13 %)<br>3. Asia (12 %)<br>4. N Atlantic & W Med (14 %)<br>5. Black Sea (14 %)<br>6. Azov Sea (3 %)<br>7. Caspian Sea (4 %) |
| EPE regions      | W Ukraine, Crimea                                                                                                                                           | W Ukraine, Crimea                                                                                                                        | Entire territory of Ukraine                                                                                                                             | W, SW & SE Ukraine, Crimea                                                                                                                                          |
